# Supplementary material for: Convergent Validation of a Self-Reported Commuting to and from School Diary in Spanish Adolescents
Source: MDPI journal article supplement (doi:10.3390/ijerph20010018), 2022-12-20
Supplement: s1 [file s1]

**Supplementary Material S3.** Self-reported diary time versus objective time in the home-school and school-home trips, for starting and ending time.

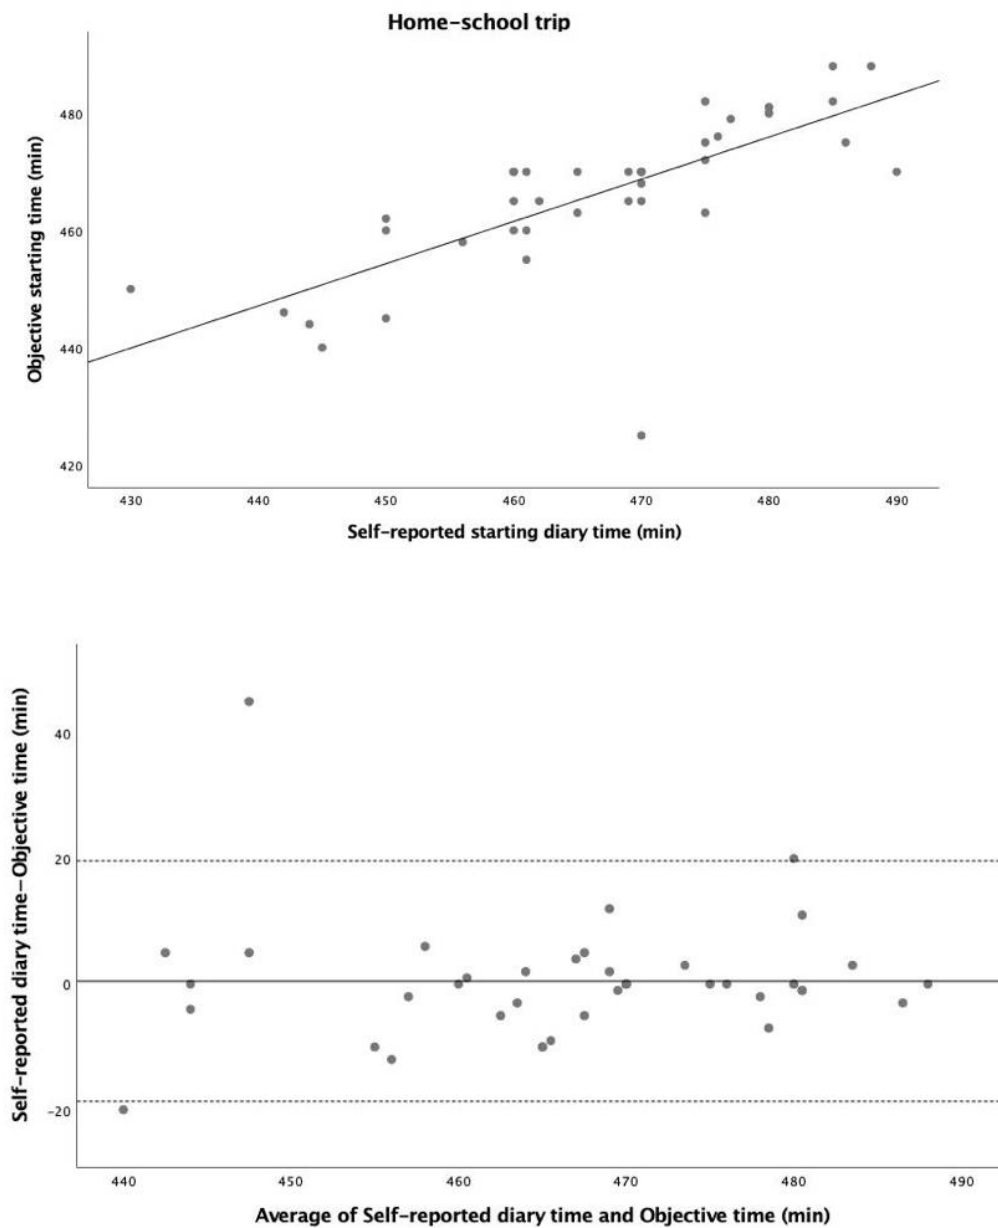

**Figure S3.** Starting time expressed as minutes (**home-school trip**). (a) Regression of the objective commuting time (y) vs. (x) the self-reported commuting diary time. The regression equation is  $y = 1.3 + 0.72x$ ,  $r = 0.735$ ,  $P < 0.001$ . (b) Bland-Altman plot of the starting time of the **home-school trip** between self-reported diary time and objective time (y) vs. Average of self-reported diary time and objective time (x). The central dotted line represents the mean of differences between the objective time measure and the self-report time measure; the upper and lower dotted lines represent the upper and lower 95% limits of agreement (mean differences  $\pm 1.96$  standard deviations of the differences), respectively. Adolescents reported 0.4 minutes (or 24 s) more in the home-school trip starting time than the objective time (95% limits of agreement were 19.6 min and -18.7 min).

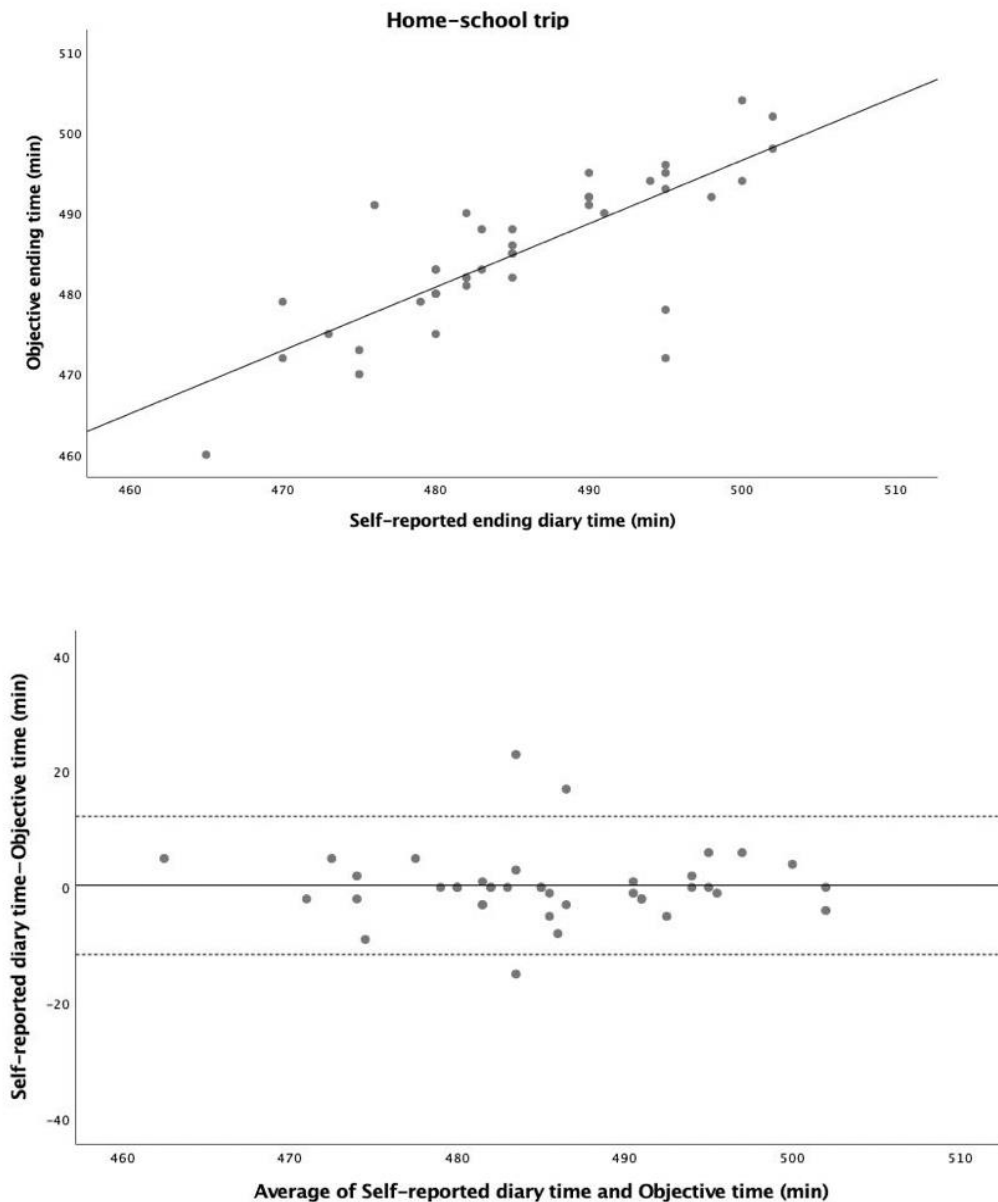

**Figure S4.** Ending time expressed as minutes (**home-school trip**). (a) Regression of the objective commuting time (y) vs. (x) the self-reported commuting diary time. The regression equation is  $y = 1.03 + 0.79x$ ,  $r = 0.784$ ,  $P < 0.001$ . (b) Bland–Altman plot of the ending time of the **home-school trip** between self-reported diary time and objective time (y) vs. Average of self-reported diary time and objective time (x). The central dotted line represents the mean of differences between the objective time measure and the self-report time measure; the upper and lower dotted lines represent the upper and lower 95% limits of agreement (mean differences  $\pm 1.96$  standard deviations of the differences), respectively. Adolescents reported 0.3 minutes (or 18 s) more in the home-school trip ending time than the objective time (95% limits of agreement were 12.3 min and  $-11.6$  min).

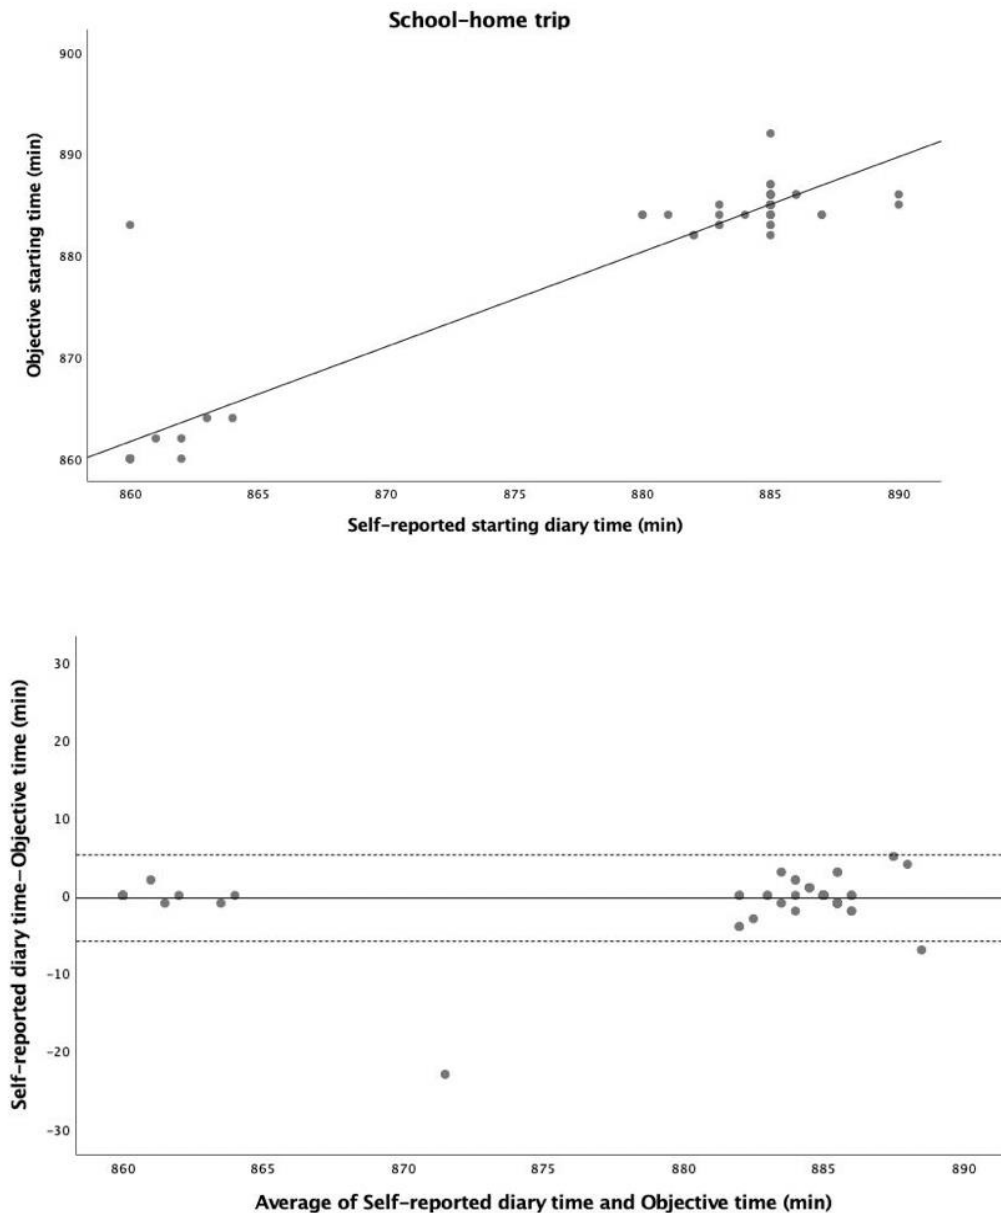

**Figure S5.** Starting time expressed as minutes (**school-home trip**). (a) Regression of the objective commuting time (y) vs. (x) the self-reported commuting diary time. The regression equation is  $y = 58.62 + 0.93x$ ,  $r = 0.956$ ,  $P < 0.001$ . (b) Bland–Altman plot of the starting time of the **school-home trip** between self-reported diary time and objective time (y) vs. Average of self-reported diary time and objective time (x). The central dotted line represents the mean of differences between the objective time measure and the self-report time measure; the upper and lower dotted lines represent the upper and lower 95% limits of agreement (mean differences  $\pm 1.96$  standard deviations of the differences), respectively. Adolescents reported 0.3 minutes (or 18 s) less in the school-home trip starting time than the objective time (95% limits of agreement were 5.2 min and  $-5.9$  min).

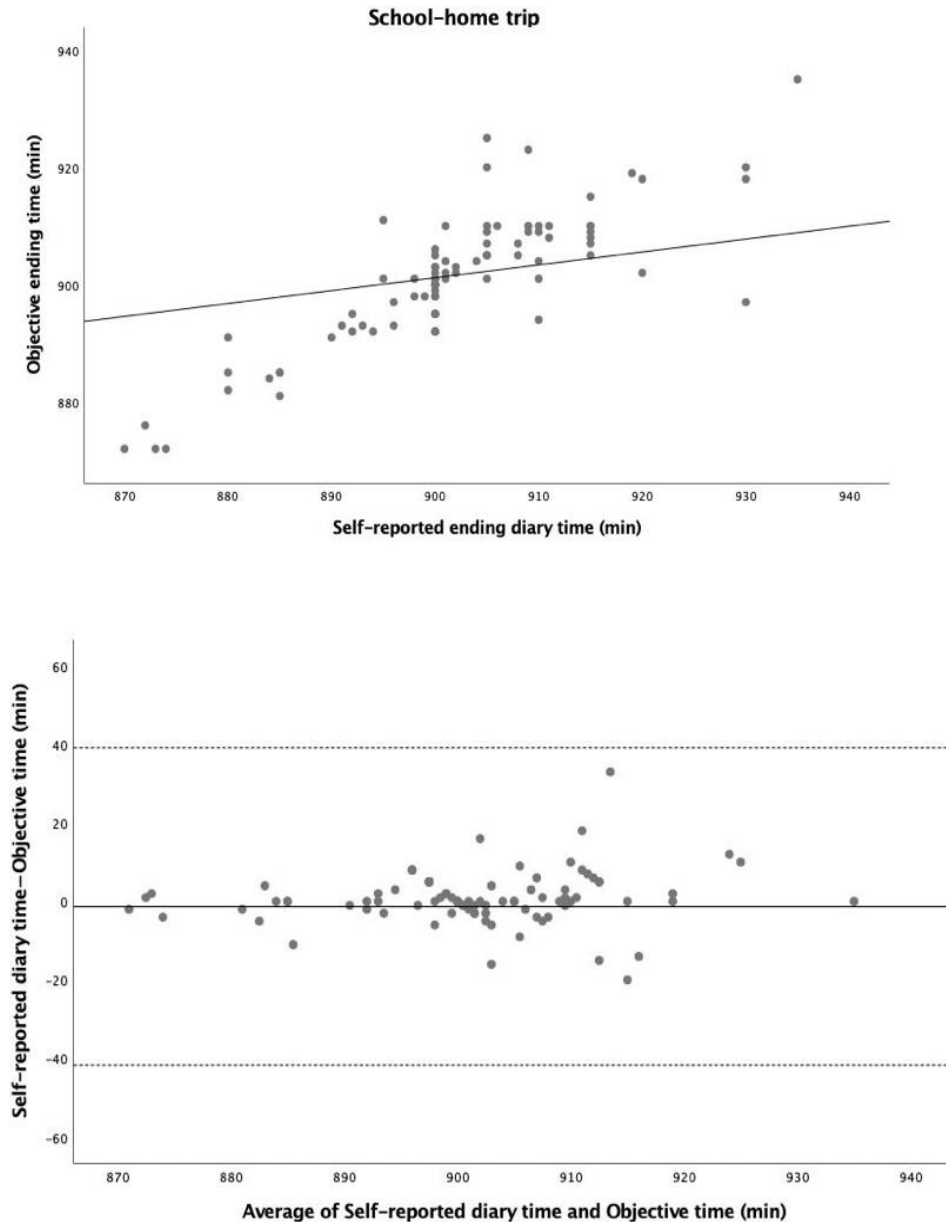

**Figure S6.** Ending time expressed as minutes (**school-home trip**). ((a) Regression of the objective commuting time (y) vs. (x) the self-reported commuting diary time. The regression equation is  $y = 7.03 + 0.22x$ ,  $r = 0.450$ ,  $P < 0.001$ . (b) Bland–Altman plot of the ending time of the **school-home trip** between self-reported diary time and objective time (y) vs. Average of self-reported diary time and objective time (x). The central dotted line represents the mean of differences between the objective time measure and the self-report time measure; the upper and lower dotted lines represent the upper and lower 95% limits of agreement (mean differences  $\pm 1.96$  standard deviations of the differences), respectively. Adolescents reported 1.3 minutes less in the school-home trip ending time than the objective time (95% limits of agreement were 39.1 min and  $-41.7$  min).
