# Supplementary material for: Convergent Validation of a Self-Reported Commuting to and from School Diary in Spanish Adolescents
Source: MDPI journal article supplement (doi:10.3390/ijerph20010018), 2022-12-20
Supplement: s1 [file s1]

**SUBJECT ID:**

**FECHA:**

| DAY 1                   |              |
|-------------------------|--------------|
| Time I get up from bed  |              |
| Time I leave home       |              |
| Time I arrive at school |              |
| Time I leave school     |              |
| Time I arrive at home   |              |
| Time I take off my belt | From:<br>To: |
| Time I take off my belt | From:<br>To: |
| Time I go to bed        |              |

| DAY 2                   |              |
|-------------------------|--------------|
| Time I get up from bed  |              |
| Time I leave home       |              |
| Time I arrive at school |              |
| Time I leave school     |              |
| Time I arrive at home   |              |
| Time I take off my belt | From:<br>To: |
| Time I take off my belt | From:<br>To: |
| Time I go to bed        |              |

| DAY 3                   |              |
|-------------------------|--------------|
| Time I get up from bed  |              |
| Time I leave home       |              |
| Time I arrive at school |              |
| Time I leave school     |              |
| Time I arrive at home   |              |
| Time I take off my belt | From:<br>To: |
| Time I take off my belt | From:<br>To: |
| Time I go to bed        |              |

| DAY 4                   |              |
|-------------------------|--------------|
| Time I get up from bed  |              |
| Time I leave home       |              |
| Time I arrive at school |              |
| Time I leave school     |              |
| Time I arrive at home   |              |
| Time I take off my belt | From:<br>To: |
| Time I take off my belt | From:<br>To: |
| Time I go to bed        |              |

| DAY 5                   |              |
|-------------------------|--------------|
| Time I get up from bed  |              |
| Time I leave home       |              |
| Time I arrive at school |              |
| Time I leave school     |              |
| Time I arrive at home   |              |
| Time I take off my belt | From:<br>To: |
| Time I take off my belt | From:<br>To: |
| Time I go to bed        |              |

| DAY 6                   |              |
|-------------------------|--------------|
| Time I get up from bed  |              |
| Time I leave home       |              |
| Time I arrive at school |              |
| Time I leave school     |              |
| Time I take off my belt |              |
| Time I take off my belt | From:<br>To: |
| Time I go to bed        | From:<br>To: |
| Time I take off my belt |              |

| DAY 7                   |              |
|-------------------------|--------------|
| Time I get up from bed  |              |
| Time I leave home       |              |
| Time I arrive at school |              |
| Time I leave school     |              |
| Time I arrive at home   |              |
| Time I take off my belt | From:<br>To: |
| Time I take off my belt | From:<br>To: |
| Time I go to bed        |              |

**ID DE SUJETO:**

**FECHA:**

| DÍA 1                           |                  |
|---------------------------------|------------------|
| Hora a la que me levanto        |                  |
| Hora a la que salgo de casa     |                  |
| Hora a la que llego al IES      |                  |
| Hora a la que salgo de IES      |                  |
| Hora a la que llego a casa      |                  |
| Hora a la que me quito cinturón | Desde:<br>Hasta: |
| Hora a la que me quito cinturón | Desde:<br>Hasta: |
| Hora a la que me acuesto        |                  |

| DÍA 2                           |                  |
|---------------------------------|------------------|
| Hora a la que me levanto        |                  |
| Hora a la que salgo de casa     |                  |
| Hora a la que llego al IES      |                  |
| Hora a la que salgo de IES      |                  |
| Hora a la que llego a casa      |                  |
| Hora a la que me quito cinturón | Desde:<br>Hasta: |
| Hora a la que me quito cinturón | Desde:<br>Hasta: |
| Hora a la que me acuesto        |                  |

| DÍA 3                           |                  |
|---------------------------------|------------------|
| Hora a la que me levanto        |                  |
| Hora a la que salgo de casa     |                  |
| Hora a la que llego al IES      |                  |
| Hora a la que salgo de IES      |                  |
| Hora a la que llego a casa      |                  |
| Hora a la que me quito cinturón | Desde:<br>Hasta: |
| Hora a la que me quito cinturón | Desde:<br>Hasta: |
| Hora a la que me acuesto        |                  |

| DÍA 4                           |                  |
|---------------------------------|------------------|
| Hora a la que me levanto        |                  |
| Hora a la que salgo de casa     |                  |
| Hora a la que llego al IES      |                  |
| Hora a la que salgo de IES      |                  |
| Hora a la que llego a casa      |                  |
| Hora a la que me quito cinturón | Desde:<br>Hasta: |
| Hora a la que me quito cinturón | Desde:<br>Hasta: |
| Hora a la que me acuesto        |                  |

| DÍA 5                           |                  |
|---------------------------------|------------------|
| Hora a la que me levanto        |                  |
| Hora a la que salgo de casa     |                  |
| Hora a la que llego al IES      |                  |
| Hora a la que salgo de IES      |                  |
| Hora a la que llego a casa      |                  |
| Hora a la que me quito cinturón | Desde:<br>Hasta: |
| Hora a la que me quito cinturón | Desde:<br>Hasta: |
| Hora a la que me acuesto        |                  |

| DÍA 6                           |                  |
|---------------------------------|------------------|
| Hora a la que me levanto        |                  |
| Hora a la que salgo de casa     |                  |
| Hora a la que llego al IES      |                  |
| Hora a la que salgo de IES      |                  |
| Hora a la que llego a casa      |                  |
| Hora a la que me quito cinturón | Desde:<br>Hasta: |
| Hora a la que me quito cinturón | Desde:<br>Hasta: |
| Hora a la que me acuesto        |                  |

| DÍA 7                           |                  |
|---------------------------------|------------------|
| Hora a la que me levanto        |                  |
| Hora a la que salgo de casa     |                  |
| Hora a la que llego al IES      |                  |
| Hora a la que salgo de IES      |                  |
| Hora a la que llego a casa      |                  |
| Hora a la que me quito cinturón | Desde:<br>Hasta: |
| Hora a la que me quito cinturón | Desde:<br>Hasta: |
| Hora a la que me acuesto        |                  |
