# Supplementary material for: Convergent Validation of a Self-Reported Commuting to and from School Diary in Spanish Adolescents
Source: MDPI journal article supplement (doi:10.3390/ijerph20010018), 2022-12-20
Supplement: s1 [file s1]

**Supplementary Material S2.** Self-reported diary time versus objective time in the total commuting time, by gender.

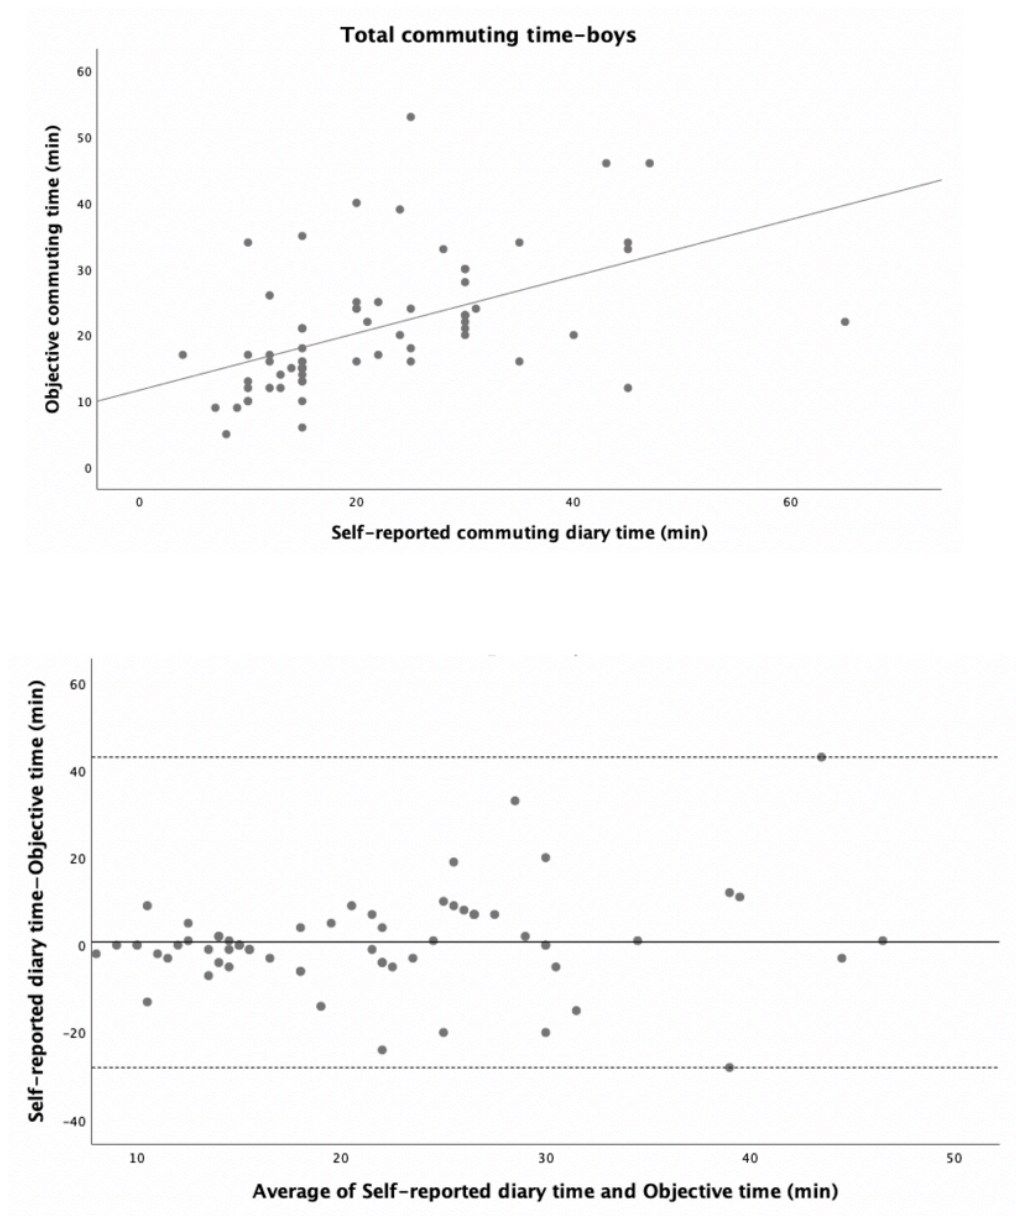

**Figure S1.** Commuting time expressed as minutes (total commuting time-boys). (a) Regression of the objective commuting time (y) vs. (x) the self-reported commuting diary time. The regression equation is  $y = 11.66 + 0.43x$ . (b) Bland-Altman plot of the total commuting time between self-reported diary time and objective time (y) vs. Average of self-reported diary time and objective time (x). The central dotted line represents the mean of differences between the self-report time measure and the objective time measure; the upper and lower dotted lines represent the upper and lower 95% limits of agreement (mean difference  $\pm 1.96$  standard deviations of the differences), respectively.

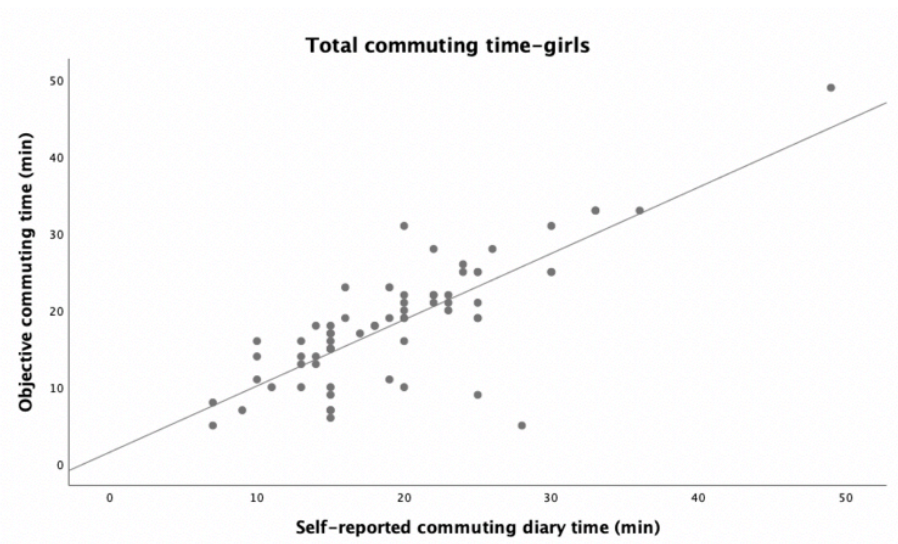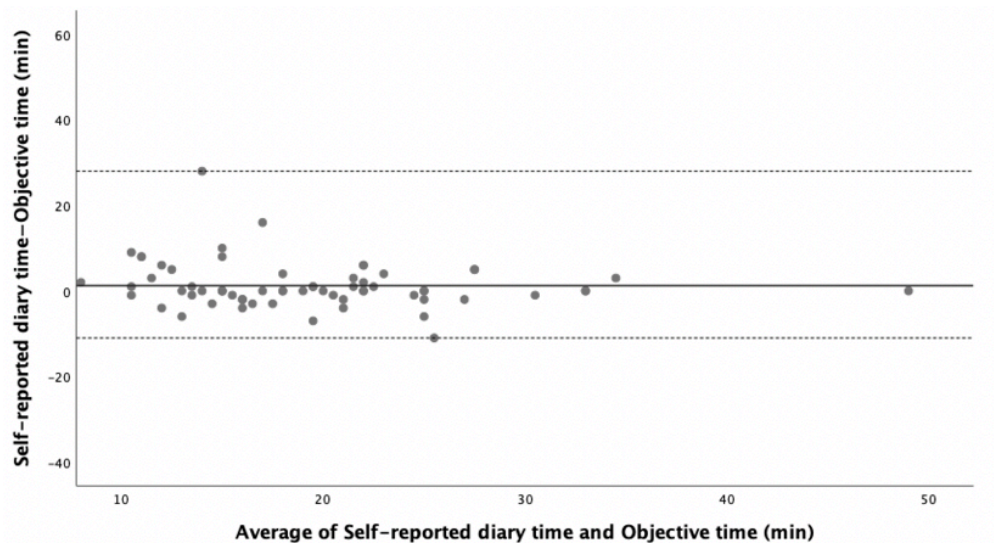

**Figure S2.** Commuting time expressed as minutes (total commuting time-girls). (a) Regression of the objective commuting time (y) vs. (x) the self-reported commuting diary time. The regression equation is  $y = 1.54 + 0.86x$ . (b) Bland–Altman plot of the total commuting time between self-reported diary time and objective time (y) vs. Average of self-reported diary time and objective time (x). The central dotted line represents the mean of differences between the self-report time measure and the objective time measure; the upper and lower dotted lines represent the upper and lower 95% limits of agreement (mean difference  $\pm 1.96$  standard deviations of the differences), respectively.
